# Supplementary material
Source: publisher figshare collection journal article supplement (https://acs.figshare.com/ndownloader/files/3886669)
Supplement: Supplementary file 1 [file 3886669]

data_complex_1 
 
_audit_creation_method            SHELXL-97 
_chemical_name_systematic 
; 
 ? 
; 
_chemical_name_common             ? 
_chemical_melting_point           ? 
_chemical_formula_moiety          ? 
_chemical_formula_sum 
 'C40 H42 Fe N6 O3 S2' 
_chemical_formula_weight          774.77 
 
loop_ 
 _atom_type_symbol 
 _atom_type_description 
 _atom_type_scat_dispersion_real 
 _atom_type_scat_dispersion_imag 
 _atom_type_scat_source 
 'C'  'C'   0.0033   0.0016 
 'International Tables Vol C Tables 4.2.6.8 and 6.1.1.4' 
 'H'  'H'   0.0000   0.0000 
 'International Tables Vol C Tables 4.2.6.8 and 6.1.1.4' 
 'N'  'N'   0.0061   0.0033 
 'International Tables Vol C Tables 4.2.6.8 and 6.1.1.4' 
 'S'  'S'   0.1246   0.1234 
 'International Tables Vol C Tables 4.2.6.8 and 6.1.1.4' 
 'Fe'  'Fe'   0.3463   0.8444 
 'International Tables Vol C Tables 4.2.6.8 and 6.1.1.4' 
 'O'  'O'   0.0106   0.0060 
 'International Tables Vol C Tables 4.2.6.8 and 6.1.1.4' 
 
_symmetry_cell_setting            Monoclinic 
_symmetry_space_group_name_H-M    C2/c
 
loop_ 
 _symmetry_equiv_pos_as_xyz 
 'x, y, z' 
 '-x, y, -z+1/2' 
 'x+1/2, y+1/2, z' 
 '-x+1/2, y+1/2, -z+1/2' 
 '-x, -y, -z' 
 'x, -y, z-1/2' 
 '-x+1/2, -y+1/2, -z' 
 'x+1/2, -y+1/2, z-1/2' 
 
_cell_length_a                    22.0389(9) 
_cell_length_b                    13.5835(5) 
_cell_length_c                    15.0343(5) 
_cell_angle_alpha                 90.00 
_cell_angle_beta                  115.944(4) 
_cell_angle_gamma                 90.00 
_cell_volume                      4047.2(3) 
_cell_formula_units_Z             4 
_cell_measurement_temperature     100(2) 
_cell_measurement_reflns_used   4632
_cell_measurement_theta_min     4.1090
_cell_measurement_theta_max     28.1170
 
_exptl_crystal_description        block 
_exptl_crystal_colour             red 
_exptl_crystal_size_max           0.10 
_exptl_crystal_size_mid           0.10 
_exptl_crystal_size_min           0.10 
_exptl_crystal_density_meas       ? 
_exptl_crystal_density_diffrn     1.272 
_exptl_crystal_density_method     'not measured' 
_exptl_crystal_F_000              1624 
_exptl_absorpt_coefficient_mu     0.519 
_exptl_absorpt_correction_type    multi-scan 
_exptl_absorpt_correction_T_min   0.9499 
_exptl_absorpt_correction_T_max   0.9499 
_exptl_absorpt_process_details    
;
CrysAlisPro, Agilent Technologies,
Version 1.171.36.28 (release 01-02-2013 CrysAlis171 .NET)
(compiled Feb  1 2013,16:14:44)
Empirical absorption correction using spherical harmonics,
 implemented in SCALE3 ABSPACK scaling algorithm.
; 
 
_exptl_special_details 
; 
 ? 
; 
 
_diffrn_ambient_temperature       100(2) 
_diffrn_radiation_wavelength      0.71073 
_diffrn_radiation_type            MoK\a 
_diffrn_radiation_source          'fine-focus sealed tube' 
_diffrn_radiation_monochromator   graphite 
_diffrn_measurement_device_type   'CCD area detector' 
_diffrn_measurement_method        '\w scans' 
_diffrn_detector_area_resol_mean  ? 
_diffrn_standards_number          ? 
_diffrn_standards_interval_count  ? 
_diffrn_standards_interval_time   ? 
_diffrn_standards_decay_%         ? 
_diffrn_reflns_number             9119 
_diffrn_reflns_av_R_equivalents   0.0187 
_diffrn_reflns_av_sigmaI/netI     0.0241 
_diffrn_reflns_limit_h_min        -27 
_diffrn_reflns_limit_h_max        22 
_diffrn_reflns_limit_k_min        -16 
_diffrn_reflns_limit_k_max        14 
_diffrn_reflns_limit_l_min        -18 
_diffrn_reflns_limit_l_max        16 
_diffrn_reflns_theta_min          3.36 
_diffrn_reflns_theta_max          26.00 
_reflns_number_total              3914 
_reflns_number_gt                 3343 
_reflns_threshold_expression      >2sigma(I) 
 
_computing_data_collection        'CrysAlisPro, Agilent Technologies' 
_computing_cell_refinement        'CrysAlisPro, Agilent Technologies'  
_computing_data_reduction         'CrysAlisPro, Agilent Technologies' 
_computing_structure_solution     'SHELXS-97 (Sheldrick, 1990)' 
_computing_structure_refinement   'SHELXL-97 (Sheldrick, 1997)' 
_computing_molecular_graphics     'Bruker SHELXTL' 
_computing_publication_material   'Bruker SHELXTL' 
 
_refine_special_details 
; 
 Refinement of F^2^ against ALL reflections.  The weighted R-factor wR and 
 goodness of fit S are based on F^2^, conventional R-factors R are based 
 on F, with F set to zero for negative F^2^. The threshold expression of 
 F^2^ > 2sigma(F^2^) is used only for calculating R-factors(gt) etc. and is 
 not relevant to the choice of reflections for refinement.  R-factors based 
 on F^2^ are statistically about twice as large as those based on F, and R- 
 factors based on ALL data will be even larger. 
; 
 
_refine_ls_structure_factor_coef  Fsqd  
_refine_ls_matrix_type            full 
_refine_ls_weighting_scheme       calc  
_refine_ls_weighting_details 
 'calc w=1/[\s^2^(Fo^2^)+(0.1000P)^2^+0.0000P] where P=(Fo^2^+2Fc^2^)/3' 
_atom_sites_solution_primary      direct 
_atom_sites_solution_secondary    difmap 
_atom_sites_solution_hydrogens    geom 
_refine_ls_hydrogen_treatment     constr 
_refine_ls_extinction_method      none 
_refine_ls_extinction_coef        ? 
_refine_ls_number_reflns          3914 
_refine_ls_number_parameters      277 
_refine_ls_number_restraints      12 
_refine_ls_R_factor_all           0.1162 
_refine_ls_R_factor_gt            0.1072 
_refine_ls_wR_factor_ref          0.3382 
_refine_ls_wR_factor_gt           0.3301 
_refine_ls_goodness_of_fit_ref    2.675 
_refine_ls_restrained_S_all       2.695 
_refine_ls_shift/su_max           0.001 
_refine_ls_shift/su_mean          0.000 
 
loop_ 
 _atom_site_label 
 _atom_site_type_symbol 
 _atom_site_fract_x 
 _atom_site_fract_y 
 _atom_site_fract_z 
 _atom_site_U_iso_or_equiv 
 _atom_site_adp_type 
 _atom_site_occupancy 
 _atom_site_symmetry_multiplicity 
 _atom_site_calc_flag 
 _atom_site_refinement_flags 
 _atom_site_disorder_assembly 
 _atom_site_disorder_group 
Fe1 Fe 0.7500 0.7500 0.0000 0.0421(4) Uani 1 2 d S . . 
S1 S 0.7416(2) 0.4089(3) -0.0800(5) 0.1110(18) Uani 0.50 1 d P . . 
S1' S 0.7124(8) 0.4360(6) -0.1544(9) 0.234(6) Uani 0.50 1 d P . . 
C1 C 0.6655(10) 0.7781(16) -0.2255(14) 0.126(7) Uani 0.50 1 d P . . 
H1A H 0.6850 0.7150 -0.2261 0.151 Uiso 0.50 1 d PR . . 
C1' C 0.6126(3) 0.7791(6) -0.1965(5) 0.0342(16) Uani 0.50 1 d P . . 
H1'A H 0.5997 0.7204 -0.1737 0.041 Uiso 0.50 1 d PR . . 
C2 C 0.6260(17) 0.825(3) -0.3099(16) 0.25(2) Uani 0.50 1 d P . . 
H2A H 0.6247 0.7962 -0.3690 0.303 Uiso 0.50 1 d PR . . 
C2' C 0.5691(4) 0.8233(7) -0.2841(5) 0.045(2) Uani 0.50 1 d P . . 
H2'A H 0.5247 0.7961 -0.3199 0.054 Uiso 0.50 1 d PR . . 
C3 C 0.5881(3) 0.9033(6) -0.3191(4) 0.083(2) Uani 1 1 d . . . 
C4 C 0.6047(11) 0.9504(13) -0.2258(14) 0.129(7) Uani 0.50 1 d P . . 
H4A H 0.5851 1.0126 -0.2229 0.155 Uiso 0.50 1 d PR . . 
C4' C 0.6502(9) 0.9059(10) -0.1385(11) 0.101(5) Uani 0.50 1 d P . . 
H4'A H 0.6636 0.9372 -0.0754 0.121 Uiso 0.50 1 d PR . . 
C5 C 0.6547(5) 0.9383(7) -0.2642(7) 0.055(2) Uani 0.50 1 d PU . . 
H5A H 0.6712 0.9925 -0.2883 0.066 Uiso 0.50 1 d PR . . 
C5' C 0.6959(4) 0.8919(6) -0.1760(6) 0.0445(19) Uani 0.50 1 d PU . . 
H5'A H 0.7412 0.9156 -0.1398 0.053 Uiso 0.50 1 d PR . . 
C6 C 0.5434(3) 0.9531(6) -0.4116(4) 0.099(3) Uani 1 1 d . . . 
C7 C 0.4773(4) 0.9732(9) -0.4320(6) 0.149(5) Uani 1 1 d . . . 
H7A H 0.4590 0.9465 -0.3897 0.179 Uiso 1 1 d R . . 
C8 C 0.4322(4) 1.0157(8) -0.5210(6) 0.136(4) Uani 1 1 d . . . 
H8A H 0.3863 1.0291 -0.5346 0.163 Uiso 1 1 d R . . 
C9 C 0.8029(3) 0.7048(6) -0.1567(5) 0.0330(15) Uani 0.50 1 d P . . 
H9A H 0.7600 0.6719 -0.1868 0.040 Uiso 0.50 1 d PR . . 
C9' C 0.8722(7) 0.6818(10) -0.0437(10) 0.078(4) Uani 0.50 1 d P . . 
H9'A H 0.8786 0.6337 0.0064 0.094 Uiso 0.50 1 d PR . . 
C10 C 0.9162(6) 0.6816(9) -0.0855(9) 0.072(3) Uani 0.50 1 d P . . 
H10A H 0.9501 0.6313 -0.0674 0.086 Uiso 0.50 1 d PR . . 
C10' C 0.8425(3) 0.7055(6) -0.2057(5) 0.0325(16) Uani 0.50 1 d P . . 
H10B H 0.8262 0.6801 -0.2717 0.039 Uiso 0.50 1 d PR . . 
C11 C 0.9107(3) 0.7473(3) -0.1561(4) 0.0483(12) Uani 1 1 d . . . 
C12 C 0.8812(14) 0.8306(14) -0.147(3) 0.199(15) Uani 0.50 1 d P . . 
H12A H 0.8830 0.8861 -0.1857 0.238 Uiso 0.50 1 d PR . . 
C12' C 0.9271(3) 0.7854(7) -0.0642(5) 0.0338(17) Uani 0.50 1 d P . . 
H12B H 0.9706 0.8150 -0.0277 0.041 Uiso 0.50 1 d PR . . 
C13 C 0.8426(15) 0.8318(12) -0.098(3) 0.198(16) Uani 0.50 1 d P . . 
H13A H 0.8182 0.8911 -0.1008 0.238 Uiso 0.50 1 d PR . . 
C13' C 0.8816(4) 0.7841(8) -0.0235(5) 0.0348(17) Uani 0.50 1 d P . . 
H13B H 0.8967 0.8113 0.0417 0.042 Uiso 0.50 1 d PR . . 
C14 C 0.9557(3) 0.7464(3) -0.2042(4) 0.0448(11) Uani 1 1 d . . . 
C15 C 0.9332(3) 0.7422(6) -0.3052(5) 0.108(4) Uani 1 1 d . . . 
H15A H 0.8854 0.7393 -0.3455 0.130 Uiso 1 1 d R . . 
C16 C 1.0258(3) 0.7454(6) -0.1494(5) 0.108(4) Uani 1 1 d . . . 
H16A H 1.0446 0.7433 -0.0785 0.129 Uiso 1 1 d R . . 
C17 C 0.7242(3) 0.5306(5) -0.0773(6) 0.089(2) Uani 1 1 d . . . 
N1 N 0.67699(18) 0.8160(3) -0.1398(3) 0.0508(10) Uani 1 1 d . . . 
N2 N 0.7180(2) 0.6095(3) -0.0584(3) 0.0559(10) Uani 1 1 d . . . 
N3 N 0.8234(2) 0.7488(2) -0.0632(3) 0.0501(11) Uani 1 1 d . . . 
 
loop_ 
 _atom_site_aniso_label 
 _atom_site_aniso_U_11 
 _atom_site_aniso_U_22 
 _atom_site_aniso_U_33 
 _atom_site_aniso_U_23 
 _atom_site_aniso_U_13 
 _atom_site_aniso_U_12 
Fe1 0.0416(6) 0.0600(7) 0.0311(6) 0.0143(3) 0.0218(4) 0.0205(3) 
S1 0.078(2) 0.076(2) 0.200(6) -0.035(3) 0.080(3) -0.0113(18) 
S1' 0.466(18) 0.111(5) 0.271(11) -0.062(6) 0.297(13) -0.024(7) 
C1 0.138(15) 0.180(16) 0.095(13) 0.061(12) 0.084(12) 0.092(13) 
C1' 0.024(3) 0.053(4) 0.016(3) 0.007(3) 0.000(3) 0.012(3) 
C2 0.30(3) 0.42(5) 0.104(15) 0.15(3) 0.15(2) 0.28(4) 
C2' 0.025(3) 0.088(6) 0.014(3) 0.017(4) 0.002(3) 0.021(4) 
C3 0.080(4) 0.129(5) 0.051(3) 0.045(3) 0.037(3) 0.062(4) 
C4 0.183(18) 0.103(11) 0.103(13) 0.059(10) 0.063(12) 0.083(12) 
C4' 0.132(12) 0.084(8) 0.076(9) 0.020(7) 0.036(9) 0.041(8) 
C5 0.057(4) 0.059(4) 0.041(4) 0.022(3) 0.014(3) 0.014(3) 
C5' 0.038(3) 0.049(4) 0.037(4) 0.020(3) 0.007(3) 0.010(3) 
C6 0.088(4) 0.162(6) 0.053(3) 0.058(4) 0.037(3) 0.077(4) 
C7 0.118(6) 0.274(12) 0.081(5) 0.115(7) 0.066(5) 0.126(7) 
C8 0.108(5) 0.242(10) 0.071(4) 0.096(6) 0.052(4) 0.119(6) 
C9 0.030(3) 0.052(4) 0.022(3) -0.008(3) 0.016(3) -0.006(3) 
C9' 0.085(8) 0.083(8) 0.088(9) 0.025(7) 0.058(7) 0.027(7) 
C10 0.071(7) 0.078(8) 0.073(8) 0.013(6) 0.038(6) 0.010(6) 
C10' 0.028(3) 0.054(4) 0.023(4) -0.010(3) 0.018(3) -0.014(3) 
C11 0.047(3) 0.062(3) 0.042(3) 0.0131(18) 0.025(2) 0.0154(18) 
C12 0.21(2) 0.082(11) 0.44(5) -0.059(19) 0.26(3) -0.021(14) 
C12' 0.012(3) 0.069(5) 0.016(3) -0.010(3) 0.002(2) 0.011(3) 
C13 0.29(3) 0.071(10) 0.42(5) -0.028(17) 0.33(4) -0.036(14) 
C13' 0.027(4) 0.062(5) 0.010(3) -0.002(3) 0.003(3) 0.009(4) 
C14 0.046(3) 0.055(3) 0.042(3) 0.0060(16) 0.026(2) 0.0077(16) 
C15 0.041(3) 0.246(12) 0.042(3) 0.009(4) 0.023(3) 0.015(3) 
C16 0.046(3) 0.241(12) 0.040(3) -0.010(4) 0.023(3) -0.006(3) 
C17 0.087(4) 0.091(4) 0.114(6) -0.023(4) 0.068(4) -0.010(3) 
N1 0.055(2) 0.066(2) 0.034(2) 0.0141(16) 0.0220(17) 0.0232(18) 
N2 0.061(2) 0.066(3) 0.049(2) 0.0103(19) 0.032(2) 0.0149(19) 
N3 0.049(2) 0.074(3) 0.038(2) 0.0170(16) 0.028(2) 0.0234(17) 
 
_geom_special_details 
; 
 All esds (except the esd in the dihedral angle between two l.s. planes) 
 are estimated using the full covariance matrix.  The cell esds are taken 
 into account individually in the estimation of esds in distances, angles 
 and torsion angles; correlations between esds in cell parameters are only 
 used when they are defined by crystal symmetry.  An approximate (isotropic) 
 treatment of cell esds is used for estimating esds involving l.s. planes. 
; 
 
loop_ 
 _geom_bond_atom_site_label_1 
 _geom_bond_atom_site_label_2 
 _geom_bond_distance 
 _geom_bond_site_symmetry_2 
 _geom_bond_publ_flag 
Fe1 N2 2.090(4) . ? 
Fe1 N2 2.090(4) 7_665 ? 
Fe1 N1 2.203(3) . ? 
Fe1 N1 2.203(3) 7_665 ? 
Fe1 N3 2.207(4) 7_665 ? 
Fe1 N3 2.207(4) . ? 
S1 S1' 1.082(12) . ? 
S1 C17 1.702(8) . ? 
S1' C17 1.672(10) . ? 
C1 N1 1.31(2) . ? 
C1 C2 1.35(2) . ? 
C1 C1' 1.412(18) . ? 
C1 C5' 1.72(3) . ? 
C1 C2' 2.008(18) . ? 
C1' C2' 1.381(9) . ? 
C1' N1 1.390(8) . ? 
C1' C4' 1.944(18) . ? 
C1' C2 1.96(2) . ? 
C2 C3 1.32(2) . ? 
C2 C2' 1.47(3) . ? 
C2 C5 1.69(5) . ? 
C2' C3 1.353(11) . ? 
C2' C4 1.94(2) . ? 
C3 C5 1.415(12) . ? 
C3 C4 1.44(2) . ? 
C3 C6 1.470(7) . ? 
C4 C4' 1.39(2) . ? 
C4 C5 1.46(2) . ? 
C4 C5' 1.977(19) . ? 
C4' N1 1.360(13) . ? 
C4' C5' 1.365(18) . ? 
C4' C5 1.984(19) . ? 
C5 C5' 1.387(11) . ? 
C5' N1 1.315(9) . ? 
C6 C7 1.379(9) . ? 
C6 C8 1.403(9) 5_674 ? 
C7 C8 1.396(8) . ? 
C8 C6 1.403(9) 5_674 ? 
C9 C10' 1.366(9) . ? 
C9 N3 1.408(8) . ? 
C9 C9' 1.746(15) . ? 
C9 C13 1.96(2) . ? 
C9' N3 1.340(12) . ? 
C9' C10 1.366(17) . ? 
C9' C13' 1.418(17) . ? 
C9' C12' 1.966(16) . ? 
C10 C11 1.351(13) . ? 
C10 C12' 1.442(17) . ? 
C10 C10' 1.855(14) . ? 
C10 C13' 2.002(15) . ? 
C10' C11 1.469(8) . ? 
C10' C12 1.93(2) . ? 
C11 C12 1.339(17) . ? 
C11 C12' 1.367(9) . ? 
C11 C14 1.460(7) . ? 
C12 C13 1.35(3) . ? 
C12 C12' 1.36(4) . ? 
C12 C13' 1.96(3) . ? 
C12' C13' 1.386(11) . ? 
C12' C13 1.81(3) . ? 
C13 C13' 1.26(3) . ? 
C13 N3 1.387(17) . ? 
C13' N3 1.249(9) . ? 
C14 C15 1.377(9) . ? 
C14 C16 1.398(8) . ? 
C15 C16 1.351(10) 2_754 ? 
C16 C15 1.351(10) 2_754 ? 
C17 N2 1.133(7) . ? 
 
loop_ 
 _geom_angle_atom_site_label_1 
 _geom_angle_atom_site_label_2 
 _geom_angle_atom_site_label_3 
 _geom_angle 
 _geom_angle_site_symmetry_1 
 _geom_angle_site_symmetry_3 
 _geom_angle_publ_flag 
N2 Fe1 N2 180.000(1) . 7_665 ? 
N2 Fe1 N1 89.98(15) . . ? 
N2 Fe1 N1 90.02(15) 7_665 . ? 
N2 Fe1 N1 90.02(15) . 7_665 ? 
N2 Fe1 N1 89.98(15) 7_665 7_665 ? 
N1 Fe1 N1 180.00(18) . 7_665 ? 
N2 Fe1 N3 90.65(14) . 7_665 ? 
N2 Fe1 N3 89.35(14) 7_665 7_665 ? 
N1 Fe1 N3 92.35(14) . 7_665 ? 
N1 Fe1 N3 87.65(14) 7_665 7_665 ? 
N2 Fe1 N3 89.35(14) . . ? 
N2 Fe1 N3 90.65(14) 7_665 . ? 
N1 Fe1 N3 87.65(14) . . ? 
N1 Fe1 N3 92.35(14) 7_665 . ? 
N3 Fe1 N3 180.00(18) 7_665 . ? 
S1' S1 C17 69.8(5) . . ? 
S1 S1' C17 72.8(6) . . ? 
N1 C1 C2 120.6(19) . . ? 
N1 C1 C1' 61.4(7) . . ? 
C2 C1 C1' 90.3(14) . . ? 
N1 C1 C5' 49.2(9) . . ? 
C2 C1 C5' 87(2) . . ? 
C1' C1 C5' 94.3(11) . . ? 
N1 C1 C2' 91.3(8) . . ? 
C2 C1 C2' 46.9(13) . . ? 
C1' C1 C2' 43.4(6) . . ? 
C5' C1 C2' 92.9(8) . . ? 
C2' C1' N1 121.7(7) . . ? 
C2' C1' C1 92.0(9) . . ? 
N1 C1' C1 55.5(10) . . ? 
C2' C1' C4' 91.4(7) . . ? 
N1 C1' C4' 44.4(5) . . ? 
C1 C1' C4' 84.3(12) . . ? 
C2' C1' C2 48.5(8) . . ? 
N1 C1' C2 85.3(13) . . ? 
C1 C1' C2 43.5(9) . . ? 
C4' C1' C2 84.9(15) . . ? 
C3 C2 C1 127(2) . . ? 
C3 C2 C2' 57.8(9) . . ? 
C1 C2 C2' 91.0(15) . . ? 
C3 C2 C5 54.5(16) . . ? 
C1 C2 C5 94(3) . . ? 
C2' C2 C5 96.9(15) . . ? 
C3 C2 C1' 91.1(9) . . ? 
C1 C2 C1' 46.2(9) . . ? 
C2' C2 C1' 44.8(7) . . ? 
C5 C2 C1' 96.2(13) . . ? 
C3 C2' C1' 121.0(7) . . ? 
C3 C2' C2 55.6(14) . . ? 
C1' C2' C2 86.7(8) . . ? 
C3 C2' C4 47.7(6) . . ? 
C1' C2' C4 88.9(7) . . ? 
C2 C2' C4 83.1(19) . . ? 
C3 C2' C1 88.1(7) . . ? 
C1' C2' C1 44.6(6) . . ? 
C2 C2' C1 42.1(8) . . ? 
C4 C2' C1 86.1(10) . . ? 
C2 C3 C2' 66.6(17) . . ? 
C2 C3 C5 76(2) . . ? 
C2' C3 C5 117.5(6) . . ? 
C2 C3 C4 112.1(14) . . ? 
C2' C3 C4 88.1(9) . . ? 
C5 C3 C4 61.6(10) . . ? 
C2 C3 C6 126.9(10) . . ? 
C2' C3 C6 123.0(7) . . ? 
C5 C3 C6 119.5(7) . . ? 
C4 C3 C6 119.9(8) . . ? 
C4' C4 C3 119.9(13) . . ? 
C4' C4 C5 88.1(12) . . ? 
C3 C4 C5 58.5(9) . . ? 
C4' C4 C2' 91.2(11) . . ? 
C3 C4 C2' 44.2(7) . . ? 
C5 C4 C2' 87.0(10) . . ? 
C4' C4 C5' 43.6(9) . . ? 
C3 C4 C5' 88.5(9) . . ? 
C5 C4 C5' 44.5(6) . . ? 
C2' C4 C5' 87.5(7) . . ? 
N1 C4' C5' 57.7(7) . . ? 
N1 C4' C4 120.9(14) . . ? 
C5' C4' C4 91.6(13) . . ? 
N1 C4' C1' 45.6(6) . . ? 
C5' C4' C1' 86.4(9) . . ? 
C4 C4' C1' 88.4(13) . . ? 
N1 C4' C5 89.0(9) . . ? 
C5' C4' C5 44.3(6) . . ? 
C4 C4' C5 47.3(10) . . ? 
C1' C4' C5 87.6(8) . . ? 
C5' C5 C3 118.9(8) . . ? 
C5' C5 C4 88.0(9) . . ? 
C3 C5 C4 59.9(10) . . ? 
C5' C5 C2 87.0(8) . . ? 
C3 C5 C2 49.4(8) . . ? 
C4 C5 C2 92.9(13) . . ? 
C5' C5 C4' 43.4(6) . . ? 
C3 C5 C4' 90.6(8) . . ? 
C4 C5 C4' 44.6(8) . . ? 
C2 C5 C4' 91.2(9) . . ? 
N1 C5' C4' 61.0(7) . . ? 
N1 C5' C5 124.0(8) . . ? 
C4' C5' C5 92.3(8) . . ? 
N1 C5' C1 48.8(6) . . ? 
C4' C5' C1 95.0(10) . . ? 
C5 C5' C1 91.5(8) . . ? 
N1 C5' C4 91.1(7) . . ? 
C4' C5' C4 44.8(8) . . ? 
C5 C5' C4 47.5(7) . . ? 
C1 C5' C4 93.4(9) . . ? 
C7 C6 C8 118.7(5) . 5_674 ? 
C7 C6 C3 120.4(5) . . ? 
C8 C6 C3 120.8(5) 5_674 . ? 
C6 C7 C8 122.3(6) . . ? 
C7 C8 C6 118.8(6) . 5_674 ? 
C10' C9 N3 122.2(6) . . ? 
C10' C9 C9' 91.8(6) . . ? 
N3 C9 C9' 48.8(5) . . ? 
C10' C9 C13 88.3(7) . . ? 
N3 C9 C13 45.0(8) . . ? 
C9' C9 C13 72.1(12) . . ? 
N3 C9' C10 124.3(11) . . ? 
N3 C9' C13' 53.8(6) . . ? 
C10 C9' C13' 92.0(10) . . ? 
N3 C9' C9 52.3(5) . . ? 
C10 C9' C9 92.7(9) . . ? 
C13' C9' C9 91.0(7) . . ? 
N3 C9' C12' 88.3(7) . . ? 
C10 C9' C12' 47.2(7) . . ? 
C13' C9' C12' 44.8(5) . . ? 
C9 C9' C12' 93.2(6) . . ? 
C11 C10 C9' 121.5(10) . . ? 
C11 C10 C12' 58.5(6) . . ? 
C9' C10 C12' 88.8(9) . . ? 
C11 C10 C10' 51.7(5) . . ? 
C9' C10 C10' 87.3(9) . . ? 
C12' C10 C10' 92.0(7) . . ? 
C11 C10 C13' 89.1(7) . . ? 
C9' C10 C13' 45.0(7) . . ? 
C12' C10 C13' 43.8(5) . . ? 
C10' C10 C13' 89.0(6) . . ? 
C9 C10' C11 118.9(6) . . ? 
C9 C10' C10 88.1(6) . . ? 
C11 C10' C10 46.2(5) . . ? 
C9 C10' C12 91.2(8) . . ? 
C11 C10' C12 43.8(7) . . ? 
C10 C10' C12 71.8(12) . . ? 
C12 C11 C10 111.2(16) . . ? 
C12 C11 C12' 60.5(16) . . ? 
C10 C11 C12' 64.1(7) . . ? 
C12 C11 C14 121.3(11) . . ? 
C10 C11 C14 122.4(6) . . ? 
C12' C11 C14 124.5(5) . . ? 
C12 C11 C10' 86.7(12) . . ? 
C10 C11 C10' 82.2(7) . . ? 
C12' C11 C10' 114.8(5) . . ? 
C14 C11 C10' 120.7(5) . . ? 
C11 C12 C13 121(2) . . ? 
C11 C12 C12' 60.7(12) . . ? 
C13 C12 C12' 84(3) . . ? 
C11 C12 C10' 49.4(7) . . ? 
C13 C12 C10' 90.0(13) . . ? 
C12' C12 C10' 91.3(11) . . ? 
C11 C12 C13' 91.1(17) . . ? 
C13 C12 C13' 39.3(17) . . ? 
C12' C12 C13' 44.9(11) . . ? 
C10' C12 C13' 88.0(10) . . ? 
C11 C12' C12 58.7(9) . . ? 
C11 C12' C13' 121.3(7) . . ? 
C12 C12' C13' 91.2(9) . . ? 
C11 C12' C10 57.4(6) . . ? 
C12 C12' C10 104.6(11) . . ? 
C13' C12' C10 90.1(8) . . ? 
C11 C12' C13 93.5(10) . . ? 
C12 C12' C13 47.6(12) . . ? 
C13' C12' C13 43.7(9) . . ? 
C10 C12' C13 103.1(8) . . ? 
C11 C12' C9' 88.8(7) . . ? 
C12 C12' C9' 101.9(10) . . ? 
C13' C12' C9' 46.1(6) . . ? 
C10 C12' C9' 44.0(6) . . ? 
C13 C12' C9' 70.6(7) . . ? 
C13' C13 C12 98(2) . . ? 
C13' C13 N3 56.1(10) . . ? 
C12 C13 N3 124.6(15) . . ? 
C13' C13 C12' 49.7(11) . . ? 
C12 C13 C12' 48.4(17) . . ? 
N3 C13 C12' 93.2(15) . . ? 
C13' C13 C9 86.8(9) . . ? 
C12 C13 C9 90.5(14) . . ? 
N3 C13 C9 45.9(6) . . ? 
C12' C13 C9 91.3(8) . . ? 
N3 C13' C13 67.2(9) . . ? 
N3 C13' C12' 125.7(7) . . ? 
C13 C13' C12' 86.6(9) . . ? 
N3 C13' C9' 59.9(7) . . ? 
C13 C13' C9' 109.6(13) . . ? 
C12' C13' C9' 89.0(8) . . ? 
N3 C13' C12 95.2(9) . . ? 
C13 C13' C12 42.8(10) . . ? 
C12' C13' C12 44.0(8) . . ? 
C9' C13' C12 99.9(8) . . ? 
N3 C13' C10 91.7(6) . . ? 
C13 C13' C10 101.1(10) . . ? 
C12' C13' C10 46.1(6) . . ? 
C9' C13' C10 43.0(6) . . ? 
C12 C13' C10 68.1(7) . . ? 
C15 C14 C16 114.8(5) . . ? 
C15 C14 C11 123.5(5) . . ? 
C16 C14 C11 121.6(5) . . ? 
C16 C15 C14 124.0(6) 2_754 . ? 
C15 C16 C14 120.9(6) 2_754 . ? 
N2 C17 S1' 154.4(9) . . ? 
N2 C17 S1 168.2(8) . . ? 
S1' C17 S1 37.4(4) . . ? 
C1 N1 C5' 82.0(11) . . ? 
C1 N1 C4' 118.1(10) . . ? 
C5' N1 C4' 61.3(8) . . ? 
C1 N1 C1' 63.1(10) . . ? 
C5' N1 C1' 116.8(5) . . ? 
C4' N1 C1' 90.0(8) . . ? 
C1 N1 Fe1 121.8(7) . . ? 
C5' N1 Fe1 118.9(4) . . ? 
C4' N1 Fe1 119.5(7) . . ? 
C1' N1 Fe1 124.2(4) . . ? 
C17 N2 Fe1 156.1(4) . . ? 
C13' N3 C9' 66.3(8) . . ? 
C13' N3 C13 56.7(14) . . ? 
C9' N3 C13 106.7(12) . . ? 
C13' N3 C9 117.1(5) . . ? 
C9' N3 C9 78.9(7) . . ? 
C13 N3 C9 89.1(13) . . ? 
C13' N3 Fe1 125.7(4) . . ? 
C9' N3 Fe1 125.5(6) . . ? 
C13 N3 Fe1 124.1(7) . . ? 
C9 N3 Fe1 117.2(4) . . ? 
 
_diffrn_measured_fraction_theta_max    0.981 
_diffrn_reflns_theta_full              26.00 
_diffrn_measured_fraction_theta_full   0.981 
_refine_diff_density_max    0.860 
_refine_diff_density_min   -0.709 
_refine_diff_density_rms    0.104 

# SQUEEZE RESULTS 
loop_
  _platon_squeeze_void_nr
  _platon_squeeze_void_average_x
  _platon_squeeze_void_average_y
  _platon_squeeze_void_average_z
  _platon_squeeze_void_volume
  _platon_squeeze_void_count_electrons
         1     0.000     0.000    -0.004     452.0      41.5
         2     0.500     0.500    -0.094     452.1      41.5
_platon_squeeze_details
;
;
#====================================================================== 
 
 
data_complex_2  
 
_audit_creation_method            SHELXL-97 
_chemical_name_systematic 
; 
 ? 
; 
_chemical_name_common             ? 
_chemical_melting_point           ? 
_chemical_formula_moiety          ? 
_chemical_formula_sum 
 'C34 H29 Fe N6 O2.50 S2' 
_chemical_formula_weight          681.60 
 
loop_ 
 _atom_type_symbol 
 _atom_type_description 
 _atom_type_scat_dispersion_real 
 _atom_type_scat_dispersion_imag 
 _atom_type_scat_source 
 'C'  'C'   0.0033   0.0016 
 'International Tables Vol C Tables 4.2.6.8 and 6.1.1.4' 
 'H'  'H'   0.0000   0.0000 
 'International Tables Vol C Tables 4.2.6.8 and 6.1.1.4' 
 'N'  'N'   0.0061   0.0033 
 'International Tables Vol C Tables 4.2.6.8 and 6.1.1.4' 
 'S'  'S'   0.1246   0.1234 
 'International Tables Vol C Tables 4.2.6.8 and 6.1.1.4' 
 'Fe'  'Fe'   0.3463   0.8444 
 'International Tables Vol C Tables 4.2.6.8 and 6.1.1.4' 
 'O'  'O'   0.0106   0.0060 
 'International Tables Vol C Tables 4.2.6.8 and 6.1.1.4' 
 
_symmetry_cell_setting            Monoclinic 
_symmetry_space_group_name_H-M    P2/c 
 
loop_ 
 _symmetry_equiv_pos_as_xyz 
 'x, y, z' 
 '-x, y, -z+1/2' 
 '-x, -y, -z' 
 'x, -y, z-1/2' 
 
_cell_length_a                    11.4071(7) 
_cell_length_b                    15.8882(12) 
_cell_length_c                    13.1892(7) 
_cell_angle_alpha                 90.00 
_cell_angle_beta                  99.639(6) 
_cell_angle_gamma                 90.00 
_cell_volume                      2356.6(3) 
_cell_formula_units_Z             2 
_cell_measurement_temperature     100(2) 
_cell_measurement_reflns_used     2904 
_cell_measurement_theta_min       3.3398 
_cell_measurement_theta_max       29.0178 
 
_exptl_crystal_description        block
_exptl_crystal_colour             yellow
_exptl_crystal_size_max           0.05 
_exptl_crystal_size_mid           0.05 
_exptl_crystal_size_min           0.05 
_exptl_crystal_density_meas       ? 
_exptl_crystal_density_diffrn     0.961 
_exptl_crystal_density_method     'not measured' 
_exptl_crystal_F_000              706 
_exptl_absorpt_coefficient_mu     0.438 
_exptl_absorpt_correction_type    multi-scan 
_exptl_absorpt_correction_T_min   0.9784 
_exptl_absorpt_correction_T_max   0.9784 
_exptl_absorpt_process_details    
;
CrysAlisPro, Agilent Technologies,
Version 1.171.36.28 (release 01-02-2013 CrysAlis171 .NET)
(compiled Feb  1 2013,16:14:44)
Empirical absorption correction using spherical harmonics,
 implemented in SCALE3 ABSPACK scaling algorithm.
;  
 
_exptl_special_details 
; 
 ? 
; 
 
_diffrn_ambient_temperature       100(2) 
_diffrn_radiation_wavelength      0.71073 
_diffrn_radiation_type            MoK\a 
_diffrn_radiation_source          'fine-focus sealed tube' 
_diffrn_radiation_monochromator   graphite 
_diffrn_measurement_device_type   'CCD area detector'  
_diffrn_measurement_method        '\w scans' 
_diffrn_detector_area_resol_mean  ? 
_diffrn_standards_number          ? 
_diffrn_standards_interval_count  ? 
_diffrn_standards_interval_time   ? 
_diffrn_standards_decay_%         ? 
_diffrn_reflns_number             10154 
_diffrn_reflns_av_R_equivalents   0.0403 
_diffrn_reflns_av_sigmaI/netI     0.0481 
_diffrn_reflns_limit_h_min        -10 
_diffrn_reflns_limit_h_max        14 
_diffrn_reflns_limit_k_min        -19 
_diffrn_reflns_limit_k_max        18 
_diffrn_reflns_limit_l_min        -16 
_diffrn_reflns_limit_l_max        12 
_diffrn_reflns_theta_min          3.35 
_diffrn_reflns_theta_max          26.00 
_reflns_number_total              4632 
_reflns_number_gt                 3271 
_reflns_threshold_expression      >2sigma(I) 
 
_computing_data_collection        'CrysAlisPro, Agilent Technologies' 
_computing_cell_refinement        'CrysAlisPro, Agilent Technologies'  
_computing_data_reduction         'CrysAlisPro, Agilent Technologies' 
_computing_structure_solution     'SHELXS-97 (Sheldrick, 1990)' 
_computing_structure_refinement   'SHELXL-97 (Sheldrick, 1997)' 
_computing_molecular_graphics     'Bruker SHELXTL' 
_computing_publication_material   'Bruker SHELXTL' 
 
_refine_special_details 
; 
 Refinement of F^2^ against ALL reflections.  The weighted R-factor wR and 
 goodness of fit S are based on F^2^, conventional R-factors R are based 
 on F, with F set to zero for negative F^2^. The threshold expression of 
 F^2^ > 2sigma(F^2^) is used only for calculating R-factors(gt) etc. and is 
 not relevant to the choice of reflections for refinement.  R-factors based 
 on F^2^ are statistically about twice as large as those based on F, and R- 
 factors based on ALL data will be even larger. 
; 
 
_refine_ls_structure_factor_coef  Fsqd  
_refine_ls_matrix_type            full 
_refine_ls_weighting_scheme       calc  
_refine_ls_weighting_details 
 'calc w=1/[\s^2^(Fo^2^)+(0.1392P)^2^+0.0000P] where P=(Fo^2^+2Fc^2^)/3' 
_atom_sites_solution_primary      direct 
_atom_sites_solution_secondary    difmap 
_atom_sites_solution_hydrogens    geom 
_refine_ls_hydrogen_treatment     constr
_refine_ls_extinction_method      none 
_refine_ls_extinction_coef        ? 
_refine_ls_number_reflns          4632 
_refine_ls_number_parameters      194 
_refine_ls_number_restraints      0 
_refine_ls_R_factor_all           0.0909 
_refine_ls_R_factor_gt            0.0683 
_refine_ls_wR_factor_ref          0.2247 
_refine_ls_wR_factor_gt           0.2051 
_refine_ls_goodness_of_fit_ref    1.057 
_refine_ls_restrained_S_all       1.057 
_refine_ls_shift/su_max           0.000 
_refine_ls_shift/su_mean          0.000 
 
loop_ 
 _atom_site_label 
 _atom_site_type_symbol 
 _atom_site_fract_x 
 _atom_site_fract_y 
 _atom_site_fract_z 
 _atom_site_U_iso_or_equiv 
 _atom_site_adp_type 
 _atom_site_occupancy 
 _atom_site_symmetry_multiplicity 
 _atom_site_calc_flag 
 _atom_site_refinement_flags 
 _atom_site_disorder_assembly 
 _atom_site_disorder_group 
Fe1 Fe 0.5000 0.60767(3) 0.7500 0.0329(2) Uani 1 2 d S . . 
S1 S 0.81429(11) 0.62546(11) 0.54553(11) 0.1011(6) Uani 1 1 d . . . 
N1 N 0.6461(2) 0.61203(15) 0.88960(19) 0.0373(6) Uani 1 1 d . . . 
N2 N 0.5000 1.4650(2) 0.7500 0.0391(8) Uani 1 2 d S . . 
N3 N 0.5000 0.7485(3) 0.7500 0.0516(10) Uani 1 2 d S . . 
N4 N 0.6300(2) 0.60505(16) 0.6557(2) 0.0435(7) Uani 1 1 d . . . 
C1 C 0.7604(3) 0.6151(2) 0.8857(3) 0.0597(11) Uani 1 1 d . . . 
H1A H 0.7825 0.6169 0.8210 0.072 Uiso 1 1 calc R . . 
C2 C 0.8499(3) 0.6158(3) 0.9694(3) 0.0663(13) Uani 1 1 d . . . 
H2B H 0.9289 0.6179 0.9602 0.080 Uiso 1 1 calc R . . 
C3 C 0.8225(3) 0.6133(2) 1.0673(3) 0.0457(8) Uani 1 1 d . . . 
C4 C 0.7018(3) 0.6110(2) 1.0722(3) 0.0567(10) Uani 1 1 d . . . 
H4A H 0.6770 0.6098 1.1358 0.068 Uiso 1 1 calc R . . 
C5 C 0.6190(3) 0.6103(2) 0.9839(3) 0.0534(10) Uani 1 1 d . . . 
H5A H 0.5390 0.6085 0.9902 0.064 Uiso 1 1 calc R . . 
C6 C 0.9129(3) 0.6129(2) 1.1609(3) 0.0567(8) Uani 1 1 d . . . 
C7 C 1.0211(6) 0.6540(6) 1.1627(5) 0.0567(8) Uani 0.50 1 d P . . 
H7A H 1.0373 0.6806 1.1012 0.068 Uiso 0.50 1 d PR . . 
C7' C 1.0208(6) 0.5724(6) 1.1635(5) 0.060(2) Uani 0.50 1 d P . . 
H7'A H 1.0327 0.5401 1.1046 0.072 Uiso 0.50 1 d PR . . 
C8 C 0.8940(6) 0.6544(5) 1.2493(5) 0.0567(8) Uani 0.50 1 d P . . 
H8A H 0.8207 0.6844 1.2477 0.068 Uiso 0.50 1 d PR . . 
C8' C 0.8948(6) 0.5721(6) 1.2494(5) 0.060(2) Uani 0.50 1 d P . . 
H8'A H 0.8213 0.5423 1.2475 0.072 Uiso 0.50 1 d PR . . 
C9 C 0.4275(3) 1.4207(2) 0.6801(2) 0.0485(8) Uani 1 1 d . . . 
H9A H 0.3757 1.4499 0.6304 0.058 Uiso 1 1 calc R . . 
C10 C 0.4250(3) 1.3341(2) 0.6772(3) 0.0522(9) Uani 1 1 d . . . 
H10A H 0.3727 1.3067 0.6261 0.063 Uiso 1 1 calc R . . 
C11 C 0.5000 1.2874(3) 0.7500 0.0528(12) Uani 1 2 d S . . 
C12 C 0.5000 1.1949(3) 0.7500 0.0616(14) Uani 1 2 d S . . 
C13 C 0.4772(6) 1.1502(3) 0.6608(4) 0.1153(15) Uani 1 1 d . . . 
H13A H 0.4592 1.1789 0.5987 0.138 Uiso 1 1 calc R . . 
C14 C 0.4801(6) 1.0630(3) 0.6601(4) 0.1153(15) Uani 1 1 d . . . 
H14A H 0.4684 1.0343 0.5977 0.138 Uiso 1 1 calc R . . 
C15 C 0.5000 1.0189(4) 0.7500 0.1153(15) Uani 1 2 d S . . 
C16 C 0.5000 0.9267(4) 0.7500 0.0696(15) Uani 1 2 d S . . 
C17 C 0.5569(8) 0.8800(3) 0.6871(6) 0.137(3) Uani 1 1 d . . . 
H17A H 0.5976 0.9069 0.6409 0.164 Uiso 1 1 calc R . . 
C18 C 0.5555(6) 0.7935(3) 0.6908(5) 0.125(2) Uani 1 1 d . . . 
H18A H 0.5978 0.7648 0.6472 0.150 Uiso 1 1 calc R . . 
C19 C 0.7066(3) 0.6134(2) 0.6107(3) 0.0469(8) Uani 1 1 d . . . 
 
loop_ 
 _atom_site_aniso_label 
 _atom_site_aniso_U_11 
 _atom_site_aniso_U_22 
 _atom_site_aniso_U_33 
 _atom_site_aniso_U_23 
 _atom_site_aniso_U_13 
 _atom_site_aniso_U_12 
Fe1 0.0322(4) 0.0348(4) 0.0290(4) 0.000 -0.0032(2) 0.000 
S1 0.0561(7) 0.1656(16) 0.0877(10) 0.0155(8) 0.0301(7) -0.0060(7) 
N1 0.0345(13) 0.0445(16) 0.0297(13) 0.0012(10) -0.0041(10) -0.0010(10) 
N2 0.0391(19) 0.037(2) 0.0408(19) 0.000 0.0043(15) 0.000 
N3 0.056(2) 0.042(2) 0.053(2) 0.000 -0.0021(19) 0.000 
N4 0.0355(14) 0.0533(17) 0.0391(14) 0.0010(12) -0.0012(11) 0.0004(11) 
C1 0.0407(19) 0.105(3) 0.0314(16) 0.0042(17) 0.0009(14) -0.0105(17) 
C2 0.0328(17) 0.129(4) 0.0341(17) 0.0024(19) -0.0047(13) -0.0132(18) 
C3 0.0377(17) 0.059(2) 0.0360(16) 0.0005(14) -0.0060(13) -0.0005(13) 
C4 0.0384(18) 0.098(3) 0.0315(16) -0.0039(16) -0.0026(13) 0.0007(16) 
C5 0.0313(16) 0.090(3) 0.0359(17) -0.0032(16) -0.0045(13) -0.0001(15) 
C6 0.0393(15) 0.091(3) 0.0357(14) 0.0012(14) -0.0057(11) 0.0018(14) 
C7 0.0393(15) 0.091(3) 0.0357(14) 0.0012(14) -0.0057(11) 0.0018(14) 
C7' 0.041(4) 0.103(6) 0.033(3) -0.012(4) -0.005(3) 0.017(4) 
C8 0.0393(15) 0.091(3) 0.0357(14) 0.0012(14) -0.0057(11) 0.0018(14) 
C8' 0.036(4) 0.099(6) 0.040(4) 0.016(4) -0.011(3) -0.016(4) 
C9 0.052(2) 0.0408(18) 0.050(2) 0.0005(16) 0.0003(15) 0.0000(15) 
C10 0.056(2) 0.0428(19) 0.054(2) -0.0051(16) -0.0027(16) -0.0032(15) 
C11 0.057(3) 0.039(3) 0.064(3) 0.000 0.011(2) 0.000 
C12 0.080(4) 0.038(3) 0.066(3) 0.000 0.012(3) 0.000 
C13 0.209(5) 0.0493(18) 0.079(2) -0.0061(17) -0.003(3) -0.004(2) 
C14 0.209(5) 0.0493(18) 0.079(2) -0.0061(17) -0.003(3) -0.004(2) 
C15 0.209(5) 0.0493(18) 0.079(2) -0.0061(17) -0.003(3) -0.004(2) 
C16 0.085(4) 0.041(3) 0.079(4) 0.000 0.003(3) 0.000 
C17 0.222(9) 0.050(3) 0.166(7) 0.006(3) 0.114(7) -0.012(3) 
C18 0.185(6) 0.043(3) 0.175(6) -0.001(3) 0.114(5) 0.006(3) 
C19 0.0387(18) 0.061(2) 0.0365(17) 0.0036(14) -0.0067(14) 0.0028(14) 
 
_geom_special_details 
; 
 All esds (except the esd in the dihedral angle between two l.s. planes) 
 are estimated using the full covariance matrix.  The cell esds are taken 
 into account individually in the estimation of esds in distances, angles 
 and torsion angles; correlations between esds in cell parameters are only 
 used when they are defined by crystal symmetry.  An approximate (isotropic) 
 treatment of cell esds is used for estimating esds involving l.s. planes. 
; 
 
loop_ 
 _geom_bond_atom_site_label_1 
 _geom_bond_atom_site_label_2 
 _geom_bond_distance 
 _geom_bond_site_symmetry_2 
 _geom_bond_publ_flag 
Fe1 N4 2.089(3) . ? 
Fe1 N4 2.089(3) 2_656 ? 
Fe1 N3 2.237(4) . ? 
Fe1 N2 2.266(4) 1_545 ? 
Fe1 N1 2.268(2) . ? 
Fe1 N1 2.268(2) 2_656 ? 
S1 C19 1.624(4) . ? 
N1 C1 1.315(4) . ? 
N1 C5 1.331(4) . ? 
N2 C9 1.332(4) . ? 
N2 C9 1.332(4) 2_656 ? 
N2 Fe1 2.266(4) 1_565 ? 
N3 C18 1.298(5) . ? 
N3 C18 1.298(5) 2_656 ? 
N4 C19 1.144(4) . ? 
C1 C2 1.373(5) . ? 
C2 C3 1.379(5) . ? 
C3 C4 1.389(5) . ? 
C3 C6 1.470(5) . ? 
C4 C5 1.372(5) . ? 
C6 C8' 1.380(8) . ? 
C6 C7' 1.384(7) . ? 
C6 C8 1.388(8) . ? 
C6 C7 1.393(8) . ? 
C7 C7' 1.297(12) . ? 
C7 C8 1.381(9) 2_757 ? 
C7 C8' 1.895(11) 2_757 ? 
C7 C8 1.990(9) . ? 
C7' C8' 1.370(9) 2_757 ? 
C7' C8 1.895(11) 2_757 ? 
C7' C8' 1.973(9) . ? 
C8 C8' 1.309(12) . ? 
C8 C7 1.381(9) 2_757 ? 
C8 C7' 1.895(11) 2_757 ? 
C8' C7' 1.370(9) 2_757 ? 
C8' C7 1.895(11) 2_757 ? 
C9 C10 1.376(5) . ? 
C10 C11 1.389(4) . ? 
C11 C10 1.389(4) 2_656 ? 
C11 C12 1.469(7) . ? 
C12 C13 1.362(6) 2_656 ? 
C12 C13 1.362(6) . ? 
C13 C14 1.385(7) . ? 
C14 C15 1.363(6) . ? 
C15 C14 1.363(6) 2_656 ? 
C15 C16 1.466(9) . ? 
C16 C17 1.356(6) 2_656 ? 
C16 C17 1.356(6) . ? 
C17 C18 1.376(7) . ? 
 
loop_ 
 _geom_angle_atom_site_label_1 
 _geom_angle_atom_site_label_2 
 _geom_angle_atom_site_label_3 
 _geom_angle 
 _geom_angle_site_symmetry_1 
 _geom_angle_site_symmetry_3 
 _geom_angle_publ_flag 
N4 Fe1 N4 177.72(14) . 2_656 ? 
N4 Fe1 N3 91.14(7) . . ? 
N4 Fe1 N3 91.14(7) 2_656 . ? 
N4 Fe1 N2 88.86(7) . 1_545 ? 
N4 Fe1 N2 88.86(7) 2_656 1_545 ? 
N3 Fe1 N2 180.000(1) . 1_545 ? 
N4 Fe1 N1 89.18(10) . . ? 
N4 Fe1 N1 90.89(9) 2_656 . ? 
N3 Fe1 N1 88.25(6) . . ? 
N2 Fe1 N1 91.75(6) 1_545 . ? 
N4 Fe1 N1 90.89(9) . 2_656 ? 
N4 Fe1 N1 89.18(10) 2_656 2_656 ? 
N3 Fe1 N1 88.25(6) . 2_656 ? 
N2 Fe1 N1 91.75(6) 1_545 2_656 ? 
N1 Fe1 N1 176.50(12) . 2_656 ? 
C1 N1 C5 115.1(3) . . ? 
C1 N1 Fe1 124.6(2) . . ? 
C5 N1 Fe1 120.2(2) . . ? 
C9 N2 C9 116.2(4) . 2_656 ? 
C9 N2 Fe1 121.9(2) . 1_565 ? 
C9 N2 Fe1 121.9(2) 2_656 1_565 ? 
C18 N3 C18 113.2(5) . 2_656 ? 
C18 N3 Fe1 123.4(3) . . ? 
C18 N3 Fe1 123.4(3) 2_656 . ? 
C19 N4 Fe1 170.8(2) . . ? 
N1 C1 C2 125.3(3) . . ? 
C1 C2 C3 119.9(3) . . ? 
C2 C3 C4 115.2(3) . . ? 
C2 C3 C6 123.3(3) . . ? 
C4 C3 C6 121.5(3) . . ? 
C5 C4 C3 120.5(3) . . ? 
N1 C5 C4 123.9(3) . . ? 
C8' C6 C7' 91.1(5) . . ? 
C8' C6 C8 56.4(5) . . ? 
C7' C6 C8 117.5(5) . . ? 
C8' C6 C7 117.6(5) . . ? 
C7' C6 C7 55.7(5) . . ? 
C8 C6 C7 91.4(5) . . ? 
C8' C6 C3 121.9(4) . . ? 
C7' C6 C3 121.3(4) . . ? 
C8 C6 C3 121.2(4) . . ? 
C7 C6 C3 120.5(4) . . ? 
C7' C7 C8 90.0(6) . 2_757 ? 
C7' C7 C6 61.8(5) . . ? 
C8 C7 C6 120.7(6) 2_757 . ? 
C7' C7 C8' 46.3(4) . 2_757 ? 
C8 C7 C8' 43.7(4) 2_757 2_757 ? 
C6 C7 C8' 92.5(5) . 2_757 ? 
C7' C7 C8 89.7(5) . . ? 
C8 C7 C8 89.6(5) 2_757 . ? 
C6 C7 C8 44.2(3) . . ? 
C8' C7 C8 89.6(4) 2_757 . ? 
C7 C7' C8' 90.5(6) . 2_757 ? 
C7 C7' C6 62.5(5) . . ? 
C8' C7' C6 121.3(6) 2_757 . ? 
C7 C7' C8 46.8(4) . 2_757 ? 
C8' C7' C8 43.7(5) 2_757 2_757 ? 
C6 C7' C8 93.4(5) . 2_757 ? 
C7 C7' C8' 90.6(5) . . ? 
C8' C7' C8' 89.8(5) 2_757 . ? 
C6 C7' C8' 44.4(3) . . ? 
C8 C7' C8' 90.1(4) 2_757 . ? 
C8' C8 C7 89.5(6) . 2_757 ? 
C8' C8 C6 61.5(5) . . ? 
C7 C8 C6 121.2(6) 2_757 . ? 
C8' C8 C7' 46.3(4) . 2_757 ? 
C7 C8 C7' 43.2(5) 2_757 2_757 ? 
C6 C8 C7' 92.7(5) . 2_757 ? 
C8' C8 C7 89.5(5) . . ? 
C7 C8 C7 90.4(5) 2_757 . ? 
C6 C8 C7 44.4(3) . . ? 
C7' C8 C7 89.9(4) 2_757 . ? 
C8 C8' C7' 90.0(6) . 2_757 ? 
C8 C8' C6 62.1(5) . . ? 
C7' C8' C6 121.6(6) 2_757 . ? 
C8 C8' C7 46.8(4) . 2_757 ? 
C7' C8' C7 43.2(5) 2_757 2_757 ? 
C6 C8' C7 93.6(5) . 2_757 ? 
C8 C8' C7' 90.2(5) . . ? 
C7' C8' C7' 90.2(5) 2_757 . ? 
C6 C8' C7' 44.5(3) . . ? 
C7 C8' C7' 90.4(4) 2_757 . ? 
N2 C9 C10 123.7(3) . . ? 
C9 C10 C11 120.5(3) . . ? 
C10 C11 C10 115.4(4) 2_656 . ? 
C10 C11 C12 122.3(2) 2_656 . ? 
C10 C11 C12 122.3(2) . . ? 
C13 C12 C13 117.0(6) 2_656 . ? 
C13 C12 C11 121.5(3) 2_656 . ? 
C13 C12 C11 121.5(3) . . ? 
C12 C13 C14 121.8(5) . . ? 
C15 C14 C13 120.5(5) . . ? 
C14 C15 C14 118.2(7) 2_656 . ? 
C14 C15 C16 120.9(3) 2_656 . ? 
C14 C15 C16 120.9(3) . . ? 
C17 C16 C17 113.7(6) 2_656 . ? 
C17 C16 C15 123.1(3) 2_656 . ? 
C17 C16 C15 123.1(3) . . ? 
C16 C17 C18 121.0(5) . . ? 
N3 C18 C17 125.5(5) . . ? 
N4 C19 S1 179.3(3) . . ? 
 
_diffrn_measured_fraction_theta_max    0.996 
_diffrn_reflns_theta_full              26.00 
_diffrn_measured_fraction_theta_full   0.996 
_refine_diff_density_max    0.999 
_refine_diff_density_min   -0.424 
_refine_diff_density_rms    0.073 

# SQUEEZE RESULTS 
loop_
  _platon_squeeze_void_nr
  _platon_squeeze_void_average_x
  _platon_squeeze_void_average_y
  _platon_squeeze_void_average_z
  _platon_squeeze_void_volume
  _platon_squeeze_void_count_electrons
         1     0.000     0.000    -0.005     979.4      15.8
_platon_squeeze_details
;
;
#====================================================================== 
 
data_complex_3 
 
_audit_creation_method            SHELXL-97 
_chemical_name_systematic 
; 
 ? 
; 
_chemical_name_common             ? 
_chemical_melting_point           ? 
_chemical_formula_moiety          ? 
_chemical_formula_sum 
 'C34 H24 Fe N6 S2' 
_chemical_formula_weight          636.56 
 
loop_ 
 _atom_type_symbol 
 _atom_type_description 
 _atom_type_scat_dispersion_real 
 _atom_type_scat_dispersion_imag 
 _atom_type_scat_source 
 'C'  'C'   0.0033   0.0016 
 'International Tables Vol C Tables 4.2.6.8 and 6.1.1.4' 
 'H'  'H'   0.0000   0.0000 
 'International Tables Vol C Tables 4.2.6.8 and 6.1.1.4' 
 'N'  'N'   0.0061   0.0033 
 'International Tables Vol C Tables 4.2.6.8 and 6.1.1.4' 
 'Fe'  'Fe'   0.3463   0.8444 
 'International Tables Vol C Tables 4.2.6.8 and 6.1.1.4' 
 'S'  'S'   0.1246   0.1234 
 'International Tables Vol C Tables 4.2.6.8 and 6.1.1.4' 
 
_symmetry_cell_setting            triclinic 
_symmetry_space_group_name_H-M    P-1
 
loop_ 
 _symmetry_equiv_pos_as_xyz 
 'x, y, z' 
 '-x, -y, -z' 
 
_cell_length_a                    7.7312(4) 
_cell_length_b                    9.0974(4) 
_cell_length_c                    11.4447(6) 
_cell_angle_alpha                 99.140(4) 
_cell_angle_beta                  104.351(5) 
_cell_angle_gamma                 104.366(5) 
_cell_volume                      734.33(7) 
_cell_formula_units_Z             1 
_cell_measurement_temperature     100(2) 
_cell_measurement_reflns_used     2791 
_cell_measurement_theta_min       3.8620 
_cell_measurement_theta_max       29.2160 
 
_exptl_crystal_description        block 
_exptl_crystal_colour             yellow 
_exptl_crystal_size_max           0.10 
_exptl_crystal_size_mid           0.10 
_exptl_crystal_size_min           0.05 
_exptl_crystal_density_meas       ? 
_exptl_crystal_density_diffrn     1.439 
_exptl_crystal_density_method     'not measured' 
_exptl_crystal_F_000              328 
_exptl_absorpt_coefficient_mu     0.691 
_exptl_absorpt_correction_type    multi-scan 
_exptl_absorpt_correction_T_min   0.9341 
_exptl_absorpt_correction_T_max   0.9662 
_exptl_absorpt_process_details    
;
CrysAlisPro, Agilent Technologies,
Version 1.171.36.28 (release 01-02-2013 CrysAlis171 .NET)
(compiled Feb  1 2013,16:14:44)
Empirical absorption correction using spherical harmonics,
 implemented in SCALE3 ABSPACK scaling algorithm.
;  
 
_exptl_special_details 
; 
 ? 
; 
 
_diffrn_ambient_temperature       100(2) 
_diffrn_radiation_wavelength      0.71073 
_diffrn_radiation_type            MoK\a 
_diffrn_radiation_source          'fine-focus sealed tube' 
_diffrn_radiation_monochromator   graphite 
_diffrn_measurement_device_type   'ccd area detector' 
_diffrn_measurement_method        '\w scans' 
_diffrn_detector_area_resol_mean  ? 
_diffrn_standards_number          ? 
_diffrn_standards_interval_count  ? 
_diffrn_standards_interval_time   ? 
_diffrn_standards_decay_%         ? 
_diffrn_reflns_number             4921 
_diffrn_reflns_av_R_equivalents   0.0221 
_diffrn_reflns_av_sigmaI/netI     0.0423 
_diffrn_reflns_limit_h_min        -9 
_diffrn_reflns_limit_h_max        9 
_diffrn_reflns_limit_k_min        -11 
_diffrn_reflns_limit_k_max        9 
_diffrn_reflns_limit_l_min        -12 
_diffrn_reflns_limit_l_max        14 
_diffrn_reflns_theta_min          3.37 
_diffrn_reflns_theta_max          26.00 
_reflns_number_total              2883 
_reflns_number_gt                 2484 
_reflns_threshold_expression      >2sigma(I) 
 
_computing_data_collection        'CrysAlisPro, Agilent Technologies' 
_computing_cell_refinement        'CrysAlisPro, Agilent Technologies' 
_computing_data_reduction         'CrysAlisPro, Agilent Technologies'  
_computing_structure_solution     'SHELXS-97 (Sheldrick, 1990)' 
_computing_structure_refinement   'SHELXL-97 (Sheldrick, 1997)' 
_computing_molecular_graphics     'Bruker SHELXTL' 
_computing_publication_material   'Bruker SHELXTL' 
 
_refine_special_details 
; 
 Refinement of F^2^ against ALL reflections.  The weighted R-factor wR and 
 goodness of fit S are based on F^2^, conventional R-factors R are based 
 on F, with F set to zero for negative F^2^. The threshold expression of 
 F^2^ > 2sigma(F^2^) is used only for calculating R-factors(gt) etc. and is 
 not relevant to the choice of reflections for refinement.  R-factors based 
 on F^2^ are statistically about twice as large as those based on F, and R- 
 factors based on ALL data will be even larger. 
; 
 
_refine_ls_structure_factor_coef  Fsqd  
_refine_ls_matrix_type            full 
_refine_ls_weighting_scheme       calc  
_refine_ls_weighting_details 
 'calc w=1/[\s^2^(Fo^2^)+(0.1000P)^2^+0.0000P] where P=(Fo^2^+2Fc^2^)/3' 
_atom_sites_solution_primary      direct 
_atom_sites_solution_secondary    difmap 
_atom_sites_solution_hydrogens    geom 
_refine_ls_hydrogen_treatment     constr 
_refine_ls_extinction_method      none 
_refine_ls_extinction_coef        ? 
_refine_ls_number_reflns          2883 
_refine_ls_number_parameters      196 
_refine_ls_number_restraints      0 
_refine_ls_R_factor_all           0.0475 
_refine_ls_R_factor_gt            0.0398 
_refine_ls_wR_factor_ref          0.1365 
_refine_ls_wR_factor_gt           0.1261 
_refine_ls_goodness_of_fit_ref    0.998 
_refine_ls_restrained_S_all       0.998 
_refine_ls_shift/su_max           0.000 
_refine_ls_shift/su_mean          0.000 
 
loop_ 
 _atom_site_label 
 _atom_site_type_symbol 
 _atom_site_fract_x 
 _atom_site_fract_y 
 _atom_site_fract_z 
 _atom_site_U_iso_or_equiv 
 _atom_site_adp_type 
 _atom_site_occupancy 
 _atom_site_symmetry_multiplicity 
 _atom_site_calc_flag 
 _atom_site_refinement_flags 
 _atom_site_disorder_assembly 
 _atom_site_disorder_group 
Fe1 Fe 1.0000 0.5000 0.0000 0.01184(18) Uani 1 2 d S . . 
S1 S 1.48743(9) 0.96499(7) 0.24716(7) 0.0283(2) Uani 1 1 d . . . 
N1 N 1.0662(3) 0.3751(2) 0.14953(18) 0.0150(4) Uani 1 1 d . . . 
N2 N 0.7539(3) 0.5138(2) 0.07391(18) 0.0150(4) Uani 1 1 d . . . 
N3 N 1.1680(3) 0.7110(2) 0.12485(18) 0.0165(4) Uani 1 1 d . . . 
C1 C 0.9059(3) 0.1103(3) 0.4894(2) 0.0171(5) Uani 1 1 d . . . 
H1 H 0.8425 0.1845 0.4826 0.021 Uiso 1 1 calc R . . 
C2 C 0.5307(3) 0.3712(3) 0.4363(2) 0.0144(5) Uani 1 1 d . . . 
H2 H 0.5506 0.2840 0.3938 0.017 Uiso 1 1 calc R . . 
C3 C 1.0218(3) 0.0942(3) 0.4152(2) 0.0146(5) Uani 1 1 d . . . 
C4 C 0.4890(3) 0.3677(3) 0.5474(2) 0.0147(5) Uani 1 1 d . . . 
H4 H 0.4825 0.2788 0.5786 0.018 Uiso 1 1 calc R . . 
C5 C 1.3012(3) 0.8173(3) 0.1765(2) 0.0154(5) Uani 1 1 d . . . 
C6 C 0.5431(3) 0.5032(3) 0.3876(2) 0.0142(5) Uani 1 1 d . . . 
C7 C 0.6457(3) 0.3805(3) 0.0872(2) 0.0160(5) Uani 1 1 d . . . 
H7 H 0.6230 0.2886 0.0291 0.019 Uiso 1 1 calc R . . 
C8 C 1.0424(3) 0.1918(3) 0.3255(2) 0.0148(5) Uani 1 1 d . . . 
C9 C 0.5986(3) 0.5082(3) 0.2726(2) 0.0134(5) Uani 1 1 d . . . 
C10 C 0.8836(3) 0.0179(3) 0.5728(2) 0.0172(5) Uani 1 1 d . . . 
H10 H 0.8055 0.0304 0.6212 0.021 Uiso 1 1 calc R . . 
C11 C 1.0469(3) 0.3476(3) 0.3514(2) 0.0155(5) Uani 1 1 d . . . 
H11 H 1.0404 0.3936 0.4282 0.019 Uiso 1 1 calc R . . 
C12 C 0.6974(3) 0.6484(3) 0.2531(2) 0.0153(5) Uani 1 1 d . . . 
H12 H 0.7143 0.7429 0.3062 0.018 Uiso 1 1 calc R . . 
C13 C 1.0580(3) 0.1328(3) 0.2085(2) 0.0179(5) Uani 1 1 d . . . 
H13 H 1.0619 0.0309 0.1874 0.022 Uiso 1 1 calc R . . 
C14 C 1.0674(4) 0.2260(3) 0.1257(2) 0.0181(5) Uani 1 1 d . . . 
H14 H 1.0750 0.1834 0.0484 0.022 Uiso 1 1 calc R . . 
C15 C 1.0609(3) 0.4342(3) 0.2637(2) 0.0169(5) Uani 1 1 d . . . 
H15 H 1.0669 0.5388 0.2846 0.020 Uiso 1 1 calc R . . 
C16 C 0.7700(3) 0.6451(3) 0.1539(2) 0.0161(5) Uani 1 1 d . . . 
H16 H 0.8338 0.7398 0.1419 0.019 Uiso 1 1 calc R . . 
C17 C 0.5665(3) 0.3732(3) 0.1830(2) 0.0168(5) Uani 1 1 d . . . 
H17 H 0.4919 0.2782 0.1876 0.020 Uiso 1 1 calc R . . 
 
loop_ 
 _atom_site_aniso_label 
 _atom_site_aniso_U_11 
 _atom_site_aniso_U_22 
 _atom_site_aniso_U_33 
 _atom_site_aniso_U_23 
 _atom_site_aniso_U_13 
 _atom_site_aniso_U_12 
Fe1 0.0148(3) 0.0121(3) 0.0094(3) 0.00402(19) 0.0058(2) 0.00223(19) 
S1 0.0215(4) 0.0148(4) 0.0399(5) -0.0025(3) 0.0044(3) 0.0009(3) 
N1 0.0179(10) 0.0169(10) 0.0124(10) 0.0072(8) 0.0074(8) 0.0041(8) 
N2 0.0173(11) 0.0197(10) 0.0114(10) 0.0065(8) 0.0072(8) 0.0068(8) 
N3 0.0194(11) 0.0164(10) 0.0137(10) 0.0033(8) 0.0075(9) 0.0029(8) 
C1 0.0171(12) 0.0196(12) 0.0148(12) 0.0065(9) 0.0031(10) 0.0059(9) 
C2 0.0160(12) 0.0139(11) 0.0145(12) 0.0010(9) 0.0072(10) 0.0052(9) 
C3 0.0165(12) 0.0160(11) 0.0099(11) 0.0050(9) 0.0029(10) 0.0020(9) 
C4 0.0161(12) 0.0154(11) 0.0139(12) 0.0053(9) 0.0076(10) 0.0031(9) 
C5 0.0222(13) 0.0175(12) 0.0134(12) 0.0066(9) 0.0098(10) 0.0117(10) 
C6 0.0131(11) 0.0167(11) 0.0135(11) 0.0038(9) 0.0067(9) 0.0026(8) 
C7 0.0158(12) 0.0180(11) 0.0127(11) 0.0008(9) 0.0061(10) 0.0022(9) 
C8 0.0140(12) 0.0185(11) 0.0119(11) 0.0062(9) 0.0034(10) 0.0038(9) 
C9 0.0110(11) 0.0191(11) 0.0135(11) 0.0067(9) 0.0064(9) 0.0058(8) 
C10 0.0180(13) 0.0224(12) 0.0129(12) 0.0063(9) 0.0073(10) 0.0051(9) 
C11 0.0184(12) 0.0193(12) 0.0102(11) 0.0053(9) 0.0047(10) 0.0065(9) 
C12 0.0181(12) 0.0148(11) 0.0147(12) 0.0021(9) 0.0074(10) 0.0062(9) 
C13 0.0238(13) 0.0168(12) 0.0155(12) 0.0051(9) 0.0086(11) 0.0067(9) 
C14 0.0227(13) 0.0206(12) 0.0141(12) 0.0056(9) 0.0085(10) 0.0081(9) 
C15 0.0177(12) 0.0183(12) 0.0147(12) 0.0046(9) 0.0039(10) 0.0060(9) 
C16 0.0199(13) 0.0164(12) 0.0173(12) 0.0093(9) 0.0100(10) 0.0068(9) 
C17 0.0166(12) 0.0162(11) 0.0170(12) 0.0033(9) 0.0088(10) 0.0007(9) 
 
_geom_special_details 
; 
 All esds (except the esd in the dihedral angle between two l.s. planes) 
 are estimated using the full covariance matrix.  The cell esds are taken 
 into account individually in the estimation of esds in distances, angles 
 and torsion angles; correlations between esds in cell parameters are only 
 used when they are defined by crystal symmetry.  An approximate (isotropic) 
 treatment of cell esds is used for estimating esds involving l.s. planes. 
; 
 
loop_ 
 _geom_bond_atom_site_label_1 
 _geom_bond_atom_site_label_2 
 _geom_bond_distance 
 _geom_bond_site_symmetry_2 
 _geom_bond_publ_flag 
Fe1 N3 2.0940(18) . ? 
Fe1 N3 2.0940(18) 2_765 ? 
Fe1 N1 2.226(2) 2_765 ? 
Fe1 N1 2.226(2) . ? 
Fe1 N2 2.2878(18) . ? 
Fe1 N2 2.2878(18) 2_765 ? 
S1 C5 1.628(2) . ? 
N1 C14 1.343(3) . ? 
N1 C15 1.347(3) . ? 
N2 C16 1.343(3) . ? 
N2 C7 1.346(3) . ? 
N3 C5 1.169(3) . ? 
C1 C10 1.382(3) . ? 
C1 C3 1.396(3) . ? 
C2 C4 1.390(3) . ? 
C2 C6 1.395(3) . ? 
C3 C10 1.399(3) 2_756 ? 
C3 C8 1.473(3) . ? 
C4 C6 1.398(3) 2_666 ? 
C6 C4 1.398(3) 2_666 ? 
C6 C9 1.485(3) . ? 
C7 C17 1.385(3) . ? 
C8 C11 1.391(3) . ? 
C8 C13 1.407(3) . ? 
C9 C17 1.394(3) . ? 
C9 C12 1.397(3) . ? 
C10 C3 1.399(3) 2_756 ? 
C11 C15 1.379(3) . ? 
C12 C16 1.385(3) . ? 
C13 C14 1.372(3) . ? 
 
loop_ 
 _geom_angle_atom_site_label_1 
 _geom_angle_atom_site_label_2 
 _geom_angle_atom_site_label_3 
 _geom_angle 
 _geom_angle_site_symmetry_1 
 _geom_angle_site_symmetry_3 
 _geom_angle_publ_flag 
N3 Fe1 N3 180.0 . 2_765 ? 
N3 Fe1 N1 90.67(7) . 2_765 ? 
N3 Fe1 N1 89.33(7) 2_765 2_765 ? 
N3 Fe1 N1 89.33(7) . . ? 
N3 Fe1 N1 90.67(7) 2_765 . ? 
N1 Fe1 N1 180.00(7) 2_765 . ? 
N3 Fe1 N2 90.49(7) . . ? 
N3 Fe1 N2 89.51(7) 2_765 . ? 
N1 Fe1 N2 96.74(7) 2_765 . ? 
N1 Fe1 N2 83.26(7) . . ? 
N3 Fe1 N2 89.51(7) . 2_765 ? 
N3 Fe1 N2 90.49(7) 2_765 2_765 ? 
N1 Fe1 N2 83.26(7) 2_765 2_765 ? 
N1 Fe1 N2 96.74(7) . 2_765 ? 
N2 Fe1 N2 180.0 . 2_765 ? 
C14 N1 C15 116.4(2) . . ? 
C14 N1 Fe1 122.44(15) . . ? 
C15 N1 Fe1 119.28(15) . . ? 
C16 N2 C7 116.10(19) . . ? 
C16 N2 Fe1 118.69(15) . . ? 
C7 N2 Fe1 117.65(15) . . ? 
C5 N3 Fe1 158.71(17) . . ? 
C10 C1 C3 121.3(2) . . ? 
C4 C2 C6 121.1(2) . . ? 
C1 C3 C10 118.4(2) . 2_756 ? 
C1 C3 C8 120.7(2) . . ? 
C10 C3 C8 120.8(2) 2_756 . ? 
C2 C4 C6 120.5(2) . 2_666 ? 
N3 C5 S1 179.4(2) . . ? 
C2 C6 C4 118.4(2) . 2_666 ? 
C2 C6 C9 120.3(2) . . ? 
C4 C6 C9 121.2(2) 2_666 . ? 
N2 C7 C17 123.4(2) . . ? 
C11 C8 C13 116.1(2) . . ? 
C11 C8 C3 121.9(2) . . ? 
C13 C8 C3 121.9(2) . . ? 
C17 C9 C12 116.6(2) . . ? 
C17 C9 C6 122.1(2) . . ? 
C12 C9 C6 121.2(2) . . ? 
C1 C10 C3 120.3(2) . 2_756 ? 
C15 C11 C8 120.3(2) . . ? 
C16 C12 C9 119.3(2) . . ? 
C14 C13 C8 119.8(2) . . ? 
N1 C14 C13 123.9(2) . . ? 
N1 C15 C11 123.4(2) . . ? 
N2 C16 C12 124.1(2) . . ? 
C7 C17 C9 120.0(2) . . ? 
 
_diffrn_measured_fraction_theta_max    0.998 
_diffrn_reflns_theta_full              26.00 
_diffrn_measured_fraction_theta_full   0.998 
_refine_diff_density_max    0.893 
_refine_diff_density_min   -0.420 
_refine_diff_density_rms    0.074 


#_eof
#End of Crystallographic Information File 
